# Supplementary material for: Proteomic and Immunochemical Characterization of Glutathione Transferase as a New Allergen of the Nematode Ascaris lumbricoides
Source: PubMed Central journal article supplement (PMC3817249; doi:10.1371/journal.pone.0078353), 2013-11-04
Supplement: pone.0078353.s001.pdf [file pone.0078353.s001.pdf]

**Supplementary file S1.** Descriptive of specific IgE levels to purified *Ascaris* and mite GSTs (n = 36)

| #  | Sample ID. | Gender | Age | IgE+ (As) | Group   | Specific IgE levels (OD units) |       |          |          |          |
|----|------------|--------|-----|-----------|---------|--------------------------------|-------|----------|----------|----------|
|    |            |        |     |           |         | rGSTA                          | nGSTA | rBlo t 8 | nBlo t 8 | rDer p 8 |
| 1  | A1073      | F      | 23  | Yes       | Asthma  | 0.242                          | 0.301 | 0.172    | 0.271    | 0.259    |
| 2  | A299       | F      | 41  | Yes       | Asthma  | 0.118                          | 0.146 | 0.116    | 0.132    | 0.152    |
| 3  | A323       | M      | 48  | Yes       | Asthma  | 0.201                          | 0.312 | 0.168    | 0.207    | 0.241    |
| 4  | A352       | F      | 9   | Yes       | Asthma  | 0.192                          | 0.332 | 0.15     | 0.34     | 0.197    |
| 5  | A368       | M      | 44  | Yes       | Asthma  | 0.252                          | 0.38  | 0.179    | 0.307    | 0.274    |
| 6  | A386       | F      | 37  | Yes       | Asthma  | 0.122                          | 0.201 | 0.098    | 0.147    | 0.115    |
| 7  | A392       | M      | 10  | Yes       | Asthma  | 0.185                          | 0.38  | 0.134    | 0.213    | 0.188    |
| 8  | A393       | F      | 16  | Yes       | Asthma  | 0.201                          | 0.312 | 0.168    | 0.207    | 0.241    |
| 9  | A448       | F      | 30  | Yes       | Asthma  | 0.485                          | 1.571 | 0.24     | 0.946    | 0.634    |
| 10 | A485       | F      | 26  | Yes       | Asthma  | 0.162                          | 0.35  | 0.12     | 0.199    | 0.264    |
| 11 | A489       | F      | 10  | Yes       | Asthma  | 0.148                          | 0.179 | 0.111    | 0.168    | 0.142    |
| 12 | A492       | F      | 30  | Yes       | Asthma  | 0.142                          | 0.182 | 0.115    | 0.139    | 0.181    |
| 13 | A519       | M      | 8   | Yes       | Asthma  | 0.127                          | 0.2   | 0.142    | 0.166    | 0.127    |
| 14 | A671       | M      | 47  | Yes       | Asthma  | 0.101                          | 0.213 | 0.087    | 0.108    | 0.147    |
| 15 | Asc067     | F      | 29  | Yes       | Asthma  | 0.117                          | 0.147 | 0.105    | 0.127    | 0.159    |
| 16 | Asc105     | F      | 23  | Yes       | Asthma  | 0.112                          | 0.135 | 0.107    | 0.103    | 0.081    |
| 17 | Asc112     | F      | 28  | Yes       | Asthma  | 0.153                          | 0.104 | 0.092    | 0.091    | 0.125    |
| 18 | Asc114     | M      | 9   | Yes       | Asthma  | 0.191                          | 0.136 | 0.083    | 0.089    | 0.089    |
| 19 | Asc125     | F      | 42  | Yes       | Asthma  | 0.113                          | 0.136 | 0.108    | 0.113    | 0.099    |
| 20 | Asc146     | M      | 7   | Yes       | Asthma  | 0.105                          | 0.174 | 0.109    | 0.164    | 0.114    |
| 21 | Asc151     | F      | 21  | Yes       | Asthma  | 0.262                          | 0.415 | 0.111    | 0.137    | 0.107    |
| 22 | Asc159     | F      | 30  | Yes       | Asthma  | 0.142                          | 0.113 | 0.089    | 0.104    | 0.116    |
| 23 | Asc227     | F      | 35  | Yes       | Asthma  | 0.137                          | 0.116 | 0.109    | 0.104    | 0.114    |
| 24 | Asc236     | F      | 21  | Yes       | Asthma  | 0.13                           | 0.144 | 0.103    | 0.149    | 0.115    |
| 25 | Asc285     | F      | 47  | Yes       | Asthma  | 1.122                          | 0.306 | 0.261    | 0.284    | 0.345    |
| 26 | Asc290     | F      | 38  | Yes       | Asthma  | 0.52                           | 0.164 | 0.156    | 0.129    | 0.218    |
| 27 | CAR271     | n.a    | n.a | Yes       | Control | 0.205                          | 0.303 | 0.14     | 0.2      | 0.231    |
| 28 | CAR799     | F      | 35  | Yes       | Control | 0.235                          | 0.269 | 0.176    | 0.25     | 0.239    |
| 29 | CAR950     | F      | 40  | Yes       | Control | 0.129                          | 0.181 | 0.103    | 0.147    | 0.138    |
| 30 | A415       | F      | 27  | No        | Asthma  | 0.089                          | 0.103 | 0.085    | 0.087    | 0.095    |
| 31 | A480       | F      | 48  | No        | Asthma  | 0.119                          | 0.102 | 0.087    | 0.095    | 0.104    |
| 32 | A498       | F      | 62  | No        | Asthma  | 0.092                          | 0.12  | 0.087    | 0.121    | 0.102    |
| 33 | Asc043     | F      | 8   | No        | Asthma  | 0.077                          | 0.095 | 0.076    | 0.081    | 0.117    |
| 34 | Asc071     | M      | 11  | No        | Asthma  | 0.086                          | 0.079 | 0.077    | 0.076    | 0.071    |
| 35 | Asc164     | F      | 26  | No        | Asthma  | 0.106                          | 0.1   | 0.085    | 0.099    | 0.094    |
| 36 | CAR272     | n.a    | n.a | No        | Control | 0.102                          | 0.092 | 0.084    | 0.084    | 0.086    |
