# Supplementary material for: Proteomic and Immunochemical Characterization of Glutathione Transferase as a New Allergen of the Nematode Ascaris lumbricoides
Source: PubMed Central journal article supplement (PMC3817249; doi:10.1371/journal.pone.0078353), 2013-11-04
Supplement: pone.0078353.s005.pdf [file pone.0078353.s005.pdf]

**Supplementary File S5-A. Peptide identifications on spot 29**

| Mass      | M/Z      | Delta(ppm) | Modifications | Sequence         | Organism                    | Entry        |
|-----------|----------|------------|---------------|------------------|-----------------------------|--------------|
| 1883.8612 | 942.9428 | -4.6654    | None          | TPMEEAQVDSIFDQFK | <i>Ascaris suum</i>         | GST1_ASCSU   |
| 1320.6561 | 441.2295 | -6.7475    | None          | VLAGFEEGDKEK     | <i>Ascaris suum</i>         | GST1_ASCSU   |
| 1063.5186 | 532.7781 | -20.6599   | None          | VLAGFEEGDK       | <i>Ascaris suum</i>         | GST1_ASCSU   |
| 1011.5865 | 506.8106 | -18.8848   | None          | LIFHQAGVK        | <i>Ascaris suum</i>         | GST1_ASCSU   |
| 956.4273  | 479.2321 | -22.2074   | None          | SGSEYMVGK        | <i>Ascaris suum</i>         | GST1_ASCSU   |
| 926.4861  | 464.2515 | -1.3834    | None          | LTYFDIR          | <i>Ascaris suum</i>         | GST1_ASCSU   |
| 815.429   | 408.732  | -23.727    | None          | YIEHVR           | <i>Ascaris suum</i>         | GST1_ASCSU   |
| 996.5855  | 499.3102 | -19.3528   | None          | DILPVELAK        | <i>Wuchereria bancrofti</i> | Q86LL8_WUCBA |
| 868.4807  | 435.2536 | -12.5093   | None          | VTYFAIR          | <i>Ascaris suum</i>         | GST2_ASCSU   |

**Supplementary File S5-B. Peptide identifications on spot 13**

| Mass      | M/Z      | Delta(ppm) | Modifications            | Sequence         | Organism                   | Entry      |
|-----------|----------|------------|--------------------------|------------------|----------------------------|------------|
| 1883.8612 | 942.9659 | -29.1582   | None                     | TPMEEAQVDSIFDQFK | <i>Ascaris suum</i>        | GST1_ASCSU |
| 1440.6641 | 481.2327 | -7.3716    | Carbamidomethyl<br>C (9) | DFMAELRPCFR      | <i>Ascaris suum</i>        | GST1_ASCSU |
| 1320.6561 | 441.2217 | 10.907     | None                     | VLAGFEEGDKEK     | <i>Ascaris suum</i>        | GST1_ASCSU |
| 1091.6339 | 364.8858 | -0.1118    | None                     | DKHLPLLEK        | <i>Ascaris suum</i>        | GST1_ASCSU |
| 1082.576  | 542.3048 | -16.5753   | None                     | EDWPALKPK        | <i>Ascaris suum</i>        | GST1_ASCSU |
| 1063.5186 | 532.7766 | -17.9053   | None                     | VLAGFEEGDK       | <i>Ascaris suum</i>        | GST1_ASCSU |
| 1011.5865 | 506.8058 | -9.352     | None                     | LIFHQAGVK        | <i>Ascaris suum</i>        | GST1_ASCSU |
| 926.4861  | 464.2283 | 48.6863    | None                     | LTYFDIR          | <i>Ascaris suum</i>        | GST1_ASCSU |
| 848.512   | 425.2708 | -16.4722   | None                     | HLPLLEK          | <i>Ascaris suum</i>        | GST1_ASCSU |
| 840.5069  | 421.2677 | -15.322    | None                     | ELPNIKK          | <i>Ascaris suum</i>        | GST1_ASCSU |
| 815.429   | 408.7241 | -4.3413    | None                     | YIEHVR           | <i>Ascaris suum</i>        | GST1_ASCSU |
| 719.3966  | 360.7067 | -1.612     | None                     | QFGLAGK          | <i>Ascaris suum</i>        | GST1_ASCSU |
| 868.4807  | 435.254  | -13.4229   | None                     | VTYFAIR          | <i>Ascaris suum</i>        | GST2_ASCSU |
| 754.4337  | 378.2266 | -5.0968    | None                     | GLAEPIR          | <i>Dirofilaria immitis</i> | GSTP_DIRIM |

**Supplementary File S5-C. Peptide identifications on spot 12**

| Mass      | M/Z      | Delta(ppm) | Modifications | Sequence         | Organism            | Entry      |
|-----------|----------|------------|---------------|------------------|---------------------|------------|
| 1883.8612 | 942.923  | 16.3941    | None          | TPMEEAQVDSIFDQFK | <i>Ascaris suum</i> | GST1_ASCSU |
| 1320.6561 | 441.2123 | 32.2597    | None          | VLAGFEEGDKEK     | <i>Ascaris suum</i> | GST1_ASCSU |
| 1091.6339 | 364.8864 | -1.6773    | None          | DKHLPLLEK        | <i>Ascaris suum</i> | GST1_ASCSU |
| 1082.576  | 542.3043 | -15.6733   | None          | EDWPALKPK        | <i>Ascaris suum</i> | GST1_ASCSU |
| 1063.5186 | 532.7742 | -13.3143   | None          | VLAGFEEGDK       | <i>Ascaris suum</i> | GST1_ASCSU |
| 1011.5865 | 506.8097 | -17.0748   | None          | LIFHQAGVK        | <i>Ascaris suum</i> | GST1_ASCSU |
| 956.4273  | 479.2177 | 7.8494     | None          | SGSEYMVGK        | <i>Ascaris suum</i> | GST1_ASCSU |
| 926.4861  | 464.2668 | -34.4531   | None          | LTYFDIR          | <i>Ascaris suum</i> | GST1_ASCSU |
| 848.512   | 425.2685 | -11.0055   | None          | HLPLLEK          | <i>Ascaris suum</i> | GST1_ASCSU |
| 840.5069  | 421.2648 | -8.4235    | None          | ELPNIKK          | <i>Ascaris suum</i> | GST1_ASCSU |
| 815.429   | 408.7302 | -19.311    | None          | YIEHVR           | <i>Ascaris suum</i> | GST1_ASCSU |
| 740.418   | 741.4347 | -11.9527   | None          | EVAVPAR          | <i>Ascaris suum</i> | GST1_ASCSU |
| 719.3966  | 720.4158 | -15.7804   | None          | QFGLAGK          | <i>Ascaris suum</i> | GST1_ASCSU |
